# Supplementary material for: Shedding Light on Peri-Urban Ecosystem Services Using Automated Content Analysis
Source: MDPI journal article supplement (doi:10.3390/su13169182), 2021-08-16
Supplement: s1 [file s1]

**Table 1.** The 55 articles published from 2012 to 2021 referring ecosystem services in European peri-urban areas.

| AUTHOR                                                                           | JOURNAL TITLE                                     | TITLE                                                                                                                                                       | YEAR |
|----------------------------------------------------------------------------------|---------------------------------------------------|-------------------------------------------------------------------------------------------------------------------------------------------------------------|------|
| Abelairas-Etxebarria, P., & Astorkiza, I.                                        | Agroforestry for Sustainable Landscape Management | Farmland prices and land-use changes in peri-urban protected natural areas                                                                                  | 2019 |
| Albert, C., & Von Haaren, C.                                                     | Sustainability                                    | Implications of Applying the Green Infrastructure Concept in Landscape Planning for Ecosystem Services in Peri-Urban Areas. An Expert Survey and Case Study | 2020 |
| Alexandre, F.                                                                    | Sustainability                                    | The Role of Vegetation in the Urban Policies of European Cities in the Age of the Sustainable City                                                          | 2013 |
| Artmann, M., & Sartison, K.                                                      | Sustainability                                    | The Role of Urban Agriculture as a Nature-Based Solution: A Review for Developing a Systemic Assessment Framework                                           | 2019 |
| Baró, F., Gómez-Baggethun, E., & Haase, D.                                       | Sustainability                                    | Ecosystem service bundles along the urban-rural gradient: Insights for landscape planning and management                                                    | 2020 |
| Baró, F., Palomo, I., Zulian, G., Vizcaino, P., Haase, D., & Gómez-Baggethun, E. | Sustainability                                    | Mapping ecosystem service capacity, flow and demand for landscape and urban planning: A case study in the Barcelona metropolitan region                     | 2019 |
| Calzolari, C., Tarocco, P., Lombardo, N., Marchi, N., & Ungaro, F.               | Ecosystem Services                                | Assessing soil ecosystem services in urban and peri-urban areas: From urban soils survey to providing support                                               | 2019 |

|                                                                                                  |                                        |                                                                                                                                                                       |      |
|--------------------------------------------------------------------------------------------------|----------------------------------------|-----------------------------------------------------------------------------------------------------------------------------------------------------------------------|------|
|                                                                                                  |                                        | tool for urban planning                                                                                                                                               |      |
|                                                                                                  |                                        | Local Scale                                                                                                                                                           |      |
| Capotorti, G., De Lazzari, V., & Alós Ortí, M.                                                   | Sustainability                         | Prioritisation of Green Infrastructure for Enhancing Biodiversity in Peri-Urban Agroecosystems: A Multi-Step Process Applied in the Metropolitan City of Rome (Italy) | 2018 |
| Casado-Arzuaga, I., Onaindia, M., Madariaga, I., & Verburg, P. H.                                | Land Use Policy                        | Mapping recreation and aesthetic value of ecosystems in the Bilbao Metropolitan Greenbelt (northern Spain) to support landscape planning                              | 2016 |
| De Vreese, R., Van Herzele, A., Dendoncker, N., Fontaine, C. M., & Leys, M.                      | Sustainability Science                 | Are stakeholders' social representations of nature and landscape compatible with the ecosystem service concept?                                                       | 2020 |
| Dewaelheyns, V., Kerselaers, E., & Rogge, E.                                                     | Land Use Policy                        | A toolbox for garden governance                                                                                                                                       | 2016 |
| Dewaelheyns, V., Rogge, E., & Gulink, H.                                                         | Nature Policies and Landscape Policies | Putting domestic gardens on the agenda using empirical spatial data: The case of Flanders                                                                             | 2016 |
| Diluiso, F., Guastella, G., & Pareglio, S.                                                       | Ecosystem Services                     | Changes in urban green spaces' value perception: A meta-analytic benefit transfer function for European cities                                                        | 2018 |
| Duží, B., Frantál, B., & Rojo, M. S.                                                             | Urban Ecosystem                        | The geography of urban agriculture: New trends and challenges                                                                                                         | 2017 |
| Fagerholm, N., Torralba, M., Moreno, G., Girardello, M., Herzog, F., Aviron, S., & Plieninger, T | Land Use Policy                        | Cross-site analysis of perceived ecosystem service benefits in multifunctional landscapes                                                                             | 2019 |
| Frascaroli, F., Zannini, P., Acosta,                                                             | Applied Geography                      | Sacred natural sites in Italy have landscape                                                                                                                          | 2014 |

|                                                                                                   |                                  |                                                                                                                                        |      |
|---------------------------------------------------------------------------------------------------|----------------------------------|----------------------------------------------------------------------------------------------------------------------------------------|------|
| A. T. R., Chiarucci, A., d'Agostino, M., & Nascimbene, J.                                         |                                  | characteristics complementary to protected areas: Implications for policy and planning                                                 |      |
| García-Llorente, M., Pérez-Ramírez, I., Sabán de la Portilla, C., Haro, C., & Benito, A.          | Sustainability                   | Agroecological Strategies for Reactivating the Agrarian Sector: The Case of Agrolab in Madrid                                          | 2019 |
| García-Llorente, M., Rossignoli, C. M., Di Iacovo, F., & Moruzzo, R.                              | Sustainability                   | Social Farming in the Promotion of Social-Ecological Sustainability in Rural and Peri-urban Areas                                      | 2017 |
| Gullino, P., Battisti, L., & Larcher, F.                                                          | Sustainability                   | Linking Multifunctionality and Sustainability for Valuing Peri-Urban Farming: A Case Study in the Turin Metropolitan Area (Italy)      | 2021 |
| Hedblom, M., Andersson, E., & Borgström, S.                                                       | Land Use Policy                  | Flexible land-use and undefined governance: From threats to potentials in peri-urban landscape planning                                | 2012 |
| Hérivaux, C., & Le Coent, P.                                                                      | Sustainability                   | Introducing Nature into Cities or Preserving Existing Peri-Urban Ecosystems? Analysis of Preferences in a Rapidly Urbanizing Catchment | 2020 |
| Honeck, E., Moilanen, A., Guinaudeau, B., Wyler, N., Schlaepfer, M. A., Martin, P., & Lehmann, A. | Land Use Policy                  | Implementing Green Infrastructure for the Spatial Planning of peri-urban areas in Geneva, Switzerland                                  | 2020 |
| Kalfas, D. G., Zagkas, D. T., Dragozi, E. I., & Zagkas, T. D.                                     | Environmental Science and Policy | Estimating value of the ecosystem services in the urban and peri-urban green of a town Florina-Greece, using the CVM                   | 2020 |

|                                                                       |                                  |                                                                                                                                                    |      |
|-----------------------------------------------------------------------|----------------------------------|----------------------------------------------------------------------------------------------------------------------------------------------------|------|
| Komossa, F., van der Zanden, E. H., & Verburg, P. H.                  | Land Use Policy                  | Characterizing outdoor recreation user groups: A typology of peri-urban recreationists in the Kromme Rijn area, the NetherLands                    | 2021 |
| La Rosa, D., Barbarossa, L., Privitera, R., & Martinico, F.           | Land Use Policy                  | Agriculture and the city: A method for sustainable planning of newforms of agriculture in urban contexts                                           | 2014 |
| Langemeyer, J., Calcagni, F., & Baro, F.                              | Landscape Ecology                | Mapping the intangible: Using geolocated social media data to examine landscape aesthetics                                                         | 2013 |
| Liquete, C., Udias, A., Conte, G., Grizzetti, B., & Masi, F.          | Planning Practice and Research   | Integrated valuation of a nature-based solution for water pollution control. Highlighting hidden benefits                                          | 2014 |
| Lorencová, E., Frélichová, J., Nelson, E., & Vačkář, D.               | Environmental Science and Policy | Past and future impacts of land use and climate change on agricultural ecosystem services in the Czech Republic                                    | 2018 |
| Massoni, E. S., Barton, D. N., Rusch, G. M., & Gundersen, V           | Land Use Policy                  | Bigger, more diverse and better? Mapping structural diversity and its recreational value in urban green spaces                                     | 2020 |
| Nielsen, A. B., Hedblom, M., Olafsson, A. S., & Wiström, B.           | Sustainability                   | Spatial configurations of urban forest in different landscape and socio-political contexts: identifying patterns for green infrastructure planning | 2016 |
| Peña, L., Onaindia, M., Fernández de Manuel, B., Ametzaga-Arregi, I., | Sustainability                   | Analysing the Synergies and Trade-Offs between ecosystem service to reorient Land Use                                                              | 2018 |

|                                                                                               |                                                             |                                                                                                                                                               |      |
|-----------------------------------------------------------------------------------------------|-------------------------------------------------------------|---------------------------------------------------------------------------------------------------------------------------------------------------------------|------|
| & Casado-Arzuaga, I.<br>(                                                                     |                                                             | Planning in<br>Metropolitan Bilbao<br>(Northern Spain)                                                                                                        |      |
| Pérez-Campaña, R., &<br>Valenzuela-Montes,<br>L. M.                                           | Integrated<br>Environmental<br>Assessment and<br>Management | Protection of peri-<br>urban agricultural<br>landscapes: case<br>study of vegas and<br>deltas in Andalucía.                                                   | 2013 |
| Poli, D.                                                                                      | Land Use Policy                                             | Food revolution and<br>agro-urban public<br>space in the European<br>bioregional city                                                                         | 2017 |
| Ramírez-Agudelo, N.<br>A., Porcar Anento, R.,<br>Villares, M., & Roca,<br>E.                  | Landscape Ecology                                           | Nature-Based<br>Solutions for Water<br>Management in Peri-<br>Urban Areas: Barriers<br>and Lessons Learned<br>from Implementation<br>Experiences              | 2017 |
| Riechers, M., Strack,<br>M., Barkmann, J., &<br>Tschardtke, T.                                | Global<br>Environmental<br>Change                           | Cultural Ecosystem<br>Services Provided by<br>Urban Green Change<br>along an Urban-Peri-<br>urban Gradient                                                    | 2017 |
| Rodríguez-Morales,<br>B., Rocas-Díaz, J. V.,<br>Kelemen, E., Pataki,<br>G., & Díaz-Varela, E. | Land Use Policy                                             | Perception of<br>ecosystem services<br>and disservices on a<br>peri-urban communal<br>forest: are<br>landowners' and<br>visitors' perspectives<br>dissimilar? | 2013 |
| Russo A., Cirella G.                                                                          | Sustainability                                              | Edible urbanism 5.0                                                                                                                                           | 2020 |
| Sanesi, G., Colangelo,<br>G., Laforteza, R.,<br>Calvo, E., & Davies,<br>C.                    | Planning Practice and<br>Research                           | Urban green<br>infrastructure and<br>urban forests: a case<br>study of the<br>Metropolitan Area of<br>Milan                                                   | 2017 |
| Sanyé-Mengual, E.,<br>Specht, K., Vávra, J.,<br>Artmann, M., Orsini,<br>F., & Gianquinto, G.  | Ecosystem Services                                          | Ecosystem Services of<br>Urban Agriculture:<br>Perceptions of Project<br>Leaders, Stakeholders<br>and the General<br>Public                                   | 2017 |
| Schulp, C. J., Van<br>Teeffelen, A. J.,<br>Tucker, G., &<br>Verburg, P. H                     | Land Use Policy                                             | A quantitative<br>assessment of policy<br>options for no net loss<br>of biodiversity and<br>ecosystem services in<br>the European Union                       | 2016 |

|                                                                                                          |                                                     |                                                                                                                                                             |      |
|----------------------------------------------------------------------------------------------------------|-----------------------------------------------------|-------------------------------------------------------------------------------------------------------------------------------------------------------------|------|
| Scott, A. J., Carter, C.,<br>Reed, M. R.,<br>Larkham, P., Adams,<br>D., Morton, N., &<br>Coles, R.       | Sustainability                                      | Disintegrated<br>development at the<br>rural–urban fringe:<br>Re-connecting spatial<br>planning theory and<br>practice                                      | 2019 |
| Semeraro, T.,<br>Radicchio, B.,<br>Medagli, P., Arzeni,<br>S., Turco, A., &<br>Geneletti, D.             | Ecosystem Services                                  | Integration of<br>Ecosystem Services in<br>Strategic<br>Environmental<br>Assessment of a Peri-<br>Urban Development<br>Plan                                 | 2016 |
| Spyra, M., La Rosa,<br>D., Zasada, I., Sylla,<br>M., & Shkaruba, A.                                      | Agroecology and<br>sustainable food<br>systems      | Governance of<br>ecosystem services<br>trade-offs in peri-<br>urban landscapes                                                                              | 2017 |
| Stefanakis, A. I.                                                                                        | Moravian<br>Geographical Reports                    | The Role of<br>Constructed<br>Wetlands as Green<br>Infrastructure for<br>Sustainable Urban<br>Water Management                                              | 2017 |
| Stürck, J., & Verburg,<br>P. H.                                                                          | Urban Ecosystem                                     | Multifunctionality at<br>what scale? A<br>landscape<br>multifunctionality<br>assessment for the<br>European Union<br>under conditions of<br>Land use change | 2017 |
| Suárez, M., Barton, D.<br>N., Cimburova, Z.,<br>Rusch, G. M., Gómez-<br>Baggethun, E., &<br>Onaindia, M. | Humanities and<br>Social Sciences<br>Communications | Environmental justice<br>and outdoor<br>recreation<br>opportunities: A<br>spatially explicit<br>assessment in Oslo<br>metropolitan area,<br>Norway          | 2019 |
| Sunguroğlu Hensel,<br>D.                                                                                 | Progress in Planning                                | Ecological<br>Prototypes: Initiating<br>Design Innovation in<br>green construction                                                                          | 2013 |
| Sylla, M., Hagemann,<br>N., & Szewrański, S.                                                             | Land Use Policy                                     | Mapping trade-offs<br>and synergies among<br>peri-urban ecosystem<br>services to address<br>spatial policy                                                  | 2018 |
| Sylla, M., Lasota, T.,<br>& Szewrański, S.                                                               | Landscape Research                                  | Valuing<br>Environmental<br>Amenities in Peri-                                                                                                              | 2016 |

|                                                                                          |                                                                                 |                                                                                                                                                        |      |
|------------------------------------------------------------------------------------------|---------------------------------------------------------------------------------|--------------------------------------------------------------------------------------------------------------------------------------------------------|------|
|                                                                                          |                                                                                 | Urban Areas:<br>Evidence from<br>Poland                                                                                                                |      |
| Tigges, J., Churkina, G., & Lakes, T.                                                    | Environmental<br>Science and Policy                                             | Modeling above-ground carbon storage: a remote sensing approach to derive individual tree species in urban settings                                    | 2020 |
| Tobias, S                                                                                | Ecosystem Services                                                              | Preserving Ecosystem Services in Urban Regions: Challenges for Planning and Best Practice Examples from Switzerland                                    | 2020 |
| Torre, C. M., Morano, P., & Tajani, F.                                                   | Applied Geography                                                               | Saving Soil for Sustainable Land Use                                                                                                                   | 2019 |
| Verhagen, W., van der Zanden, E. H., Strauch, M., van Teeffelen, A. J., & Verburg, P. H. | Sustainability                                                                  | Optimizing the allocation of agri-environment measures to navigate the trade-offs between ecosystem services, biodiversity and agricultural production | 2020 |
| Wandl, A., Rooij, R., & Rocco, R.                                                        | European Spatial<br>Research and Policy                                         | Towards Sustainable Territories-in-Between: A Multidimensional Typology of Open Spaces in Europe                                                       | 2013 |
| Wolpert, F., Quintas-Soriano, C., & Plieninger, T.                                       | The International<br>Journal of Sustainable<br>Development and<br>World Ecology | Exploring land-use histories of tree-crop landscapes: a cross-site comparison in the Mediterranean Basin                                               | 2020 |
